# Supplementary material for: A Bilevel Optimization Approach for Computing Synthetic Data to Mitigate Unfairness in Collaborative Machine Learning
Source: Atypon-hosted journal article supplement (doi:10.1287/ijoo.2025.0091), 2026-01-29
Supplement: ijoo.2025.0091.sm1.docx [file ijoo.2025.0091.sm1.docx]

As a separate document, please write one paragraph in which the following questions are answered:

a. What does the paper aspire to do?

b. What does it achieve?

c. Is it part of a more general research program?

d. What is relationship of the authors?

This paper provides a new perspective on how fairness and privacy concerns can be addressed in distributed and collaborative machine learning. It presents a framework that contributes to ongoing efforts on fair learning and privacy-aware learning without relying on centralized access to data. This work is part of a broader research effort on fairness and privacy in distributed settings; our group plans to continue pursuing related research questions that extend from this work. The authors’ relationship is as follows: Daniel P. Robinson is Chia-Yuan Wu’s advisor, and Frank E. Curtis is a faculty member in the same department with expertise in optimization and machine learning."
